# Supplementary material for: Self-assembled fibrillar networks induced by two methods: a new unmodified natural product gel
Source: Royal Society of Chemistry journal article supplement (doi:10.1039/c8nj01302k), 2018-01-01
Supplement: c8nj01302k1.pdf [file c8nj01302k1.pdf]

Manuscript ID: NJ-ART-03-2018-001302.R1

Title: Self-assembled fibrillar networks induced by two methods: a new unmodified natural product gel

Author: Ning He, Xin Yang\*

Journal: New Journal of Chemistry

### Electronic Supplementary Information

## Self-assembled fibrillar networks induced by two methods: a new unmodified natural product gel

Ning He<sup>†</sup> [a], Kangkang Zhi<sup>†</sup> [a], Xin Yang\*<sup>[a]</sup>, Haitian Zhao\*<sup>[a]</sup>, Hua Zhang<sup>[a]</sup>, Jing Wang\*<sup>[a,b]</sup> and Zhenyu Wang<sup>[a]</sup>

---

[a] Ning H,K. Zhi, H. Zhao, X. Yang, H Zhang, Z Wang  
School of Chemistry and Chemical Engineering  
Harbin Institute of Technology  
No. 92 West Dazhi Street,Nan Gang District,Harbin, Heilongjiang, China 150000  
E-mail: [yangxin@hit.edu.cn](mailto:yangxin@hit.edu.cn)

[b] J. Wang  
Key Laboratory of Agro-Product Quality and Safety  
Institute of Quality Standard and Testing Technology for Agro-Product, Chinese Academy of Agricultural Sciences, No.12, Zhongguancun South St.,Haidian District, Beijing, China 100081 E-mail: [w\\_jing2001@126.com](mailto:w_jing2001@126.com)

[†] Ning He and KangKang Zhi contributed equally to this work and should be considered co-first authors.

## 1.Supporting Tables

Table S1. Gelation Results for Sito in 47 organic solvents

| No. | Solvent                 | Sonication | CGC(S-gel) | Heat | CGC(T-gel) |
|-----|-------------------------|------------|------------|------|------------|
| 1   | Methanol                | P          | --         | G    | 9.04       |
| 2   | Ethanol                 | P          | --         | PG   | --         |
| 3   | N-propanol              | P          | --         | S    | --         |
| 4   | Butanol                 | S          | --         | S    | --         |
| 5   | N-pentanol              | S          | --         | S    | --         |
| 6   | N-hexanol               | S          | --         | S    | --         |
| 7   | N-heptanol              | S          | --         | S    | --         |
| 8   | N-octanol               | S          | --         | S    | --         |
| 9   | Nonyl alcohol           | S          | --         | S    | --         |
| 10  | N-decanol               | S          | --         | S    | --         |
| 11  | Ethylene glycol         | S          | --         | S    | --         |
| 12  | 1,2,3-propanetriol      | S          | --         | S    | --         |
| 13  | Isopropanol             | S          | --         | S    | --         |
| 14  | Tert-butanol            | S          | --         | S    | --         |
| 15  | Benzyl alcohol          | S          | --         | S    | --         |
| 16  | benzene                 | P          | --         | P    | --         |
| 17  | Toluene                 | P          | --         | P    | --         |
| 18  | Xylene (ortho)          | P          | --         | P    | --         |
| 19  | Xylene (meta)           | P          | --         | P    | --         |
| 20  | Xylene (para)           | P          | --         | P    | --         |
| 21  | Mesitylene              | P          | --         | P    | --         |
| 22  | chlorobenzene           | S          | --         | S    | --         |
| 23  | Bromobenzene            | S          | --         | S    | --         |
| 24  | Dichlorobenzene (ortho) | S          | --         | S    | --         |
| 25  | Nitrobenzene            | P          | --         | S    | --         |
| 26  | 4-methoxybenzaldehyde   | S          | --         | S    | --         |
| 27  | Dichloromethane         | S          | --         | S    | --         |
| 28  | Trichloromethane        | S          | --         | S    | --         |
| 29  | Carbon tetrachloride    | S          | --         | S    | --         |
| 30  | Tetrachloroethane       | S          | --         | S    | --         |
| 31  | Cyclohexane             | G          | 12.0       | G    | 8.93       |
| 32  | N-hexane                | G          | 12.8       | PG   | --         |
| 33  | N-heptane               | S          | --         | S    | --         |
| 34  | Triethylamine           | S          | --         | S    | --         |
| 35  | Butylamine              | S          | --         | S    | --         |
| 36  | aniline                 | S          | --         | S    | --         |
| 37  | Benzylamine             | S          | --         | S    | --         |
| 38  | Dimethyl sulfoxide      | S          | --         | G    | 10.9       |
| 39  | dimethylformamide       | S          | --         | S    | --         |
| 40  | Pyridine                | S          | --         | S    | --         |

|    |                 |   |    |   |      |
|----|-----------------|---|----|---|------|
| 41 | Tetrahydrofuran | S | -- | S | --   |
| 42 | Acetonitrile    | P | -- | G | 10.3 |
| 43 | Acetic acid     | P | -- | S | --   |
| 44 | acetone         | P | -- | S | --   |
| 45 | Ethyl acetate   | S | -- | S | --   |
| 46 | Petroleum ether | S | -- | S | --   |
| 47 | Ether           | S | -- | S | --   |

\*G= gel; S=solutions; P= precipitate; PG=partial gel; "--" not determined.

## 2.Supporting Figures

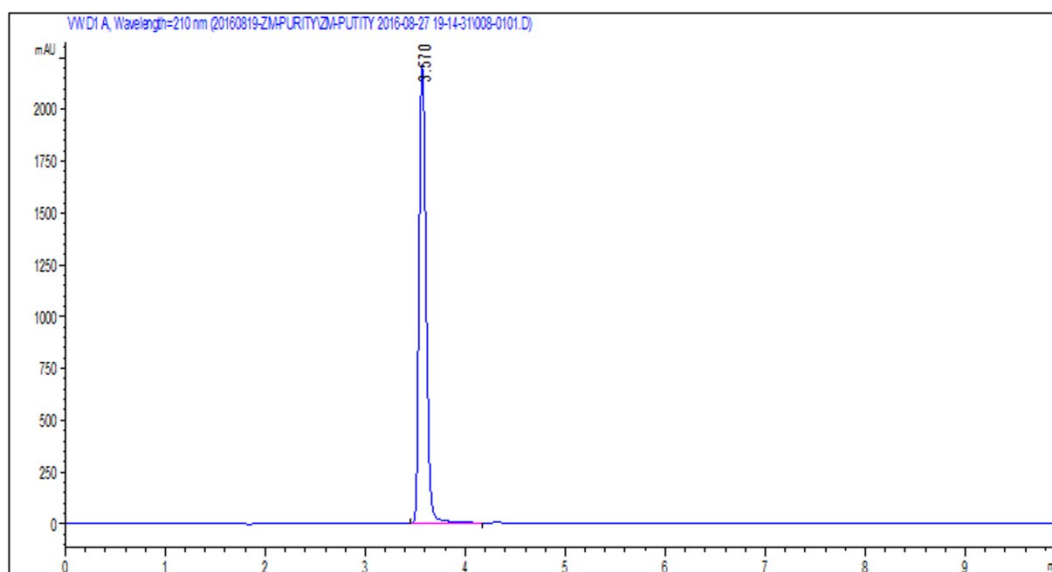

Figure S1 Determination of the purity of the compound 1

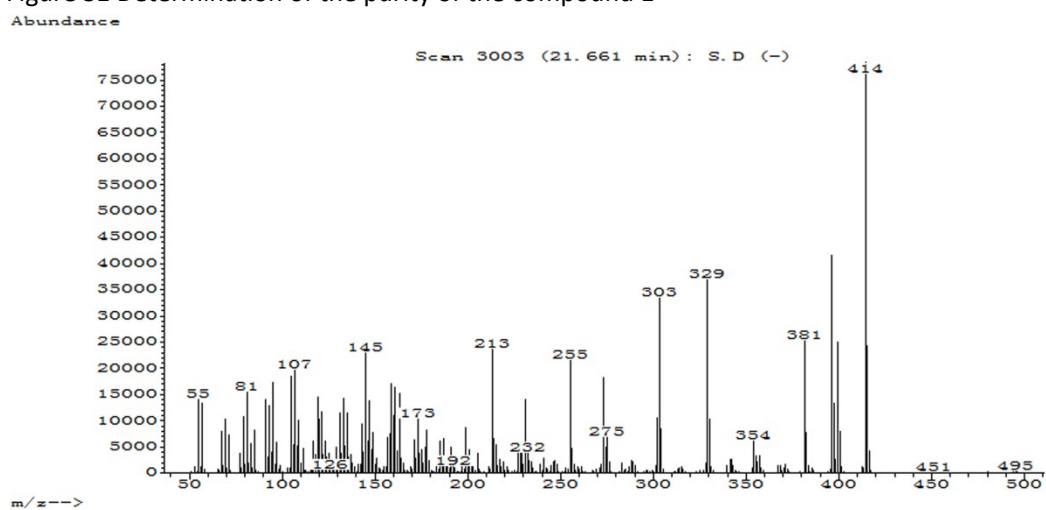

Figure S2 EIMS of compound 1

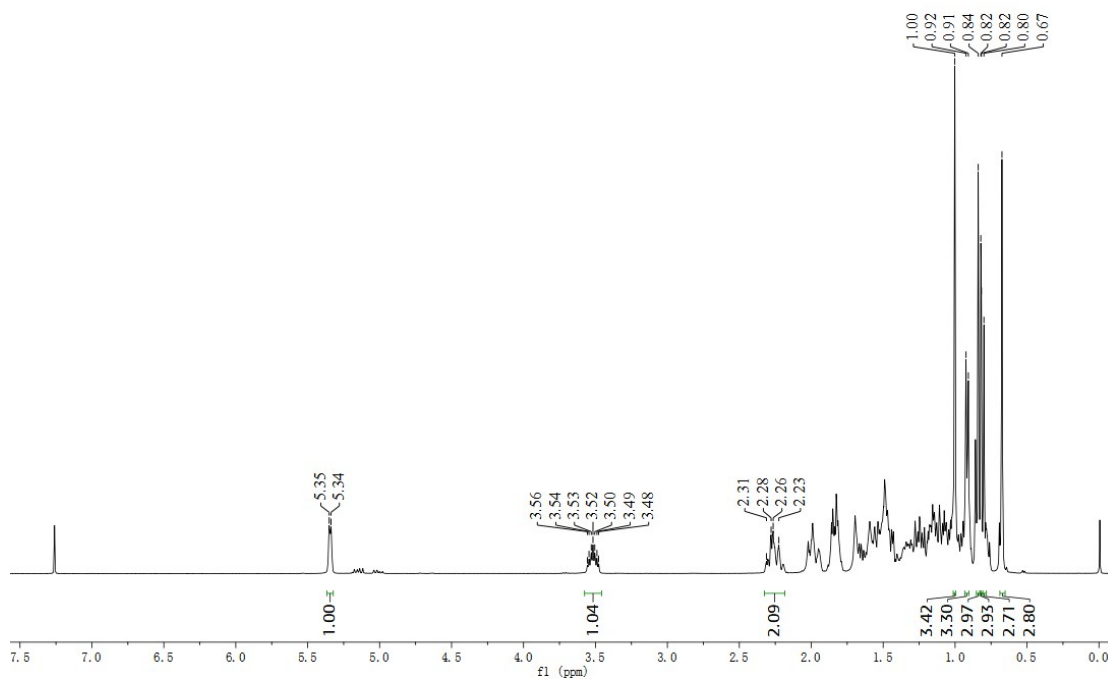

Figure S3  $^1\text{H}$ -NMR of compound 1

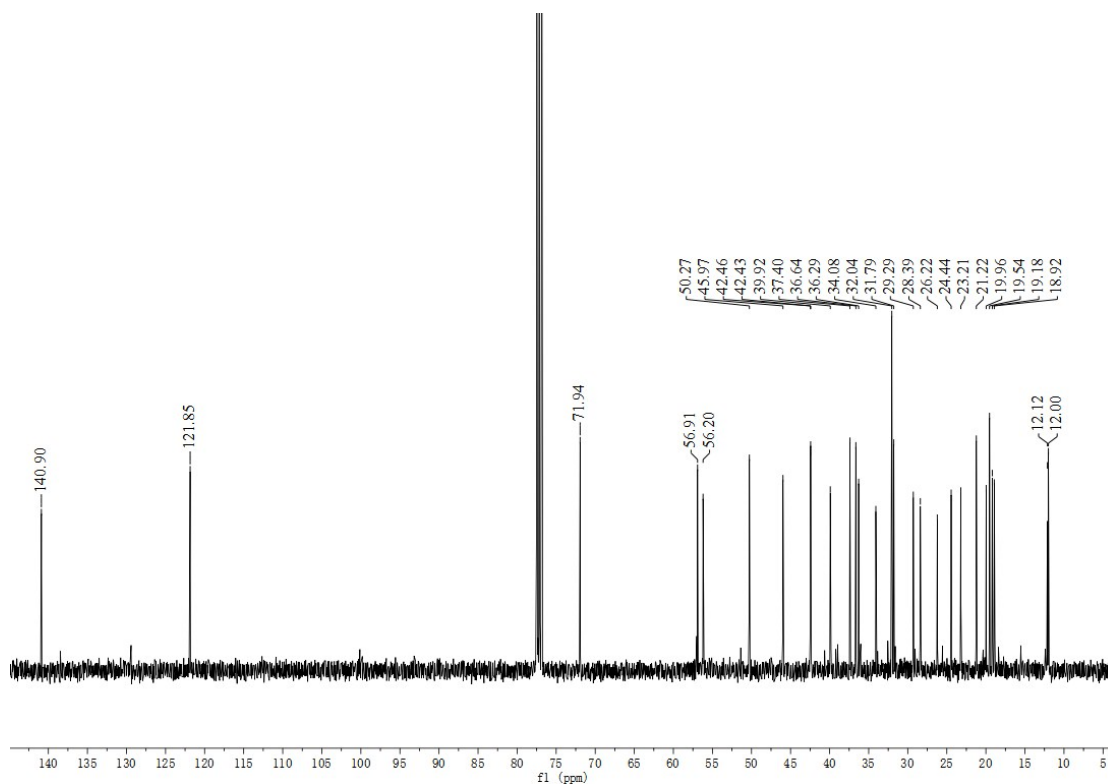

Figure S4  $^{13}\text{C}$ -NMR of compound 1

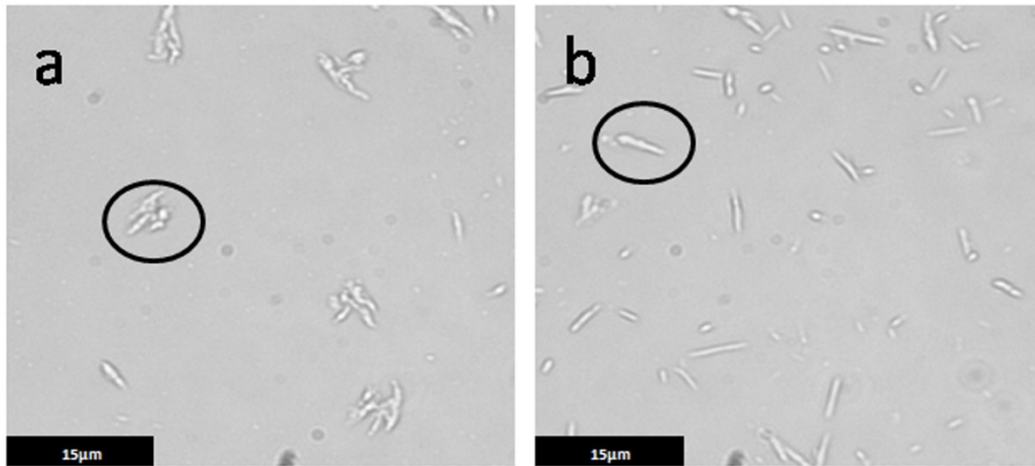

Figure S5 Optical microscope images of the non-nano scale Sito (a) and Sito nanoscale-xerogel (b) dispersed in the DMSO+medium with doses of  $50 \mu\text{mol L}^{-1}$ .
